# Supplementary material for: Introducing Computed Tomography Simulation–Free and Electronic Patient-Reported Outcomes–Monitored Palliative Radiation Therapy into Routine Care: Clinical Outcomes and Implementation Experience
Source: PubMed Central journal article supplement — Adv Radiat Oncol. 2020 Dec 3;6(2):100632. doi: 10.1016/j.adro.2020.100632 (PMC8039552; doi:10.1016/j.adro.2020.100632), 2020-12-03
Supplement: mmc4.pdf [file mmc4.pdf]

Strata + ECOG=0 + ECOG=1 + ECOG=2 + ECOG=3 + ECOG=4

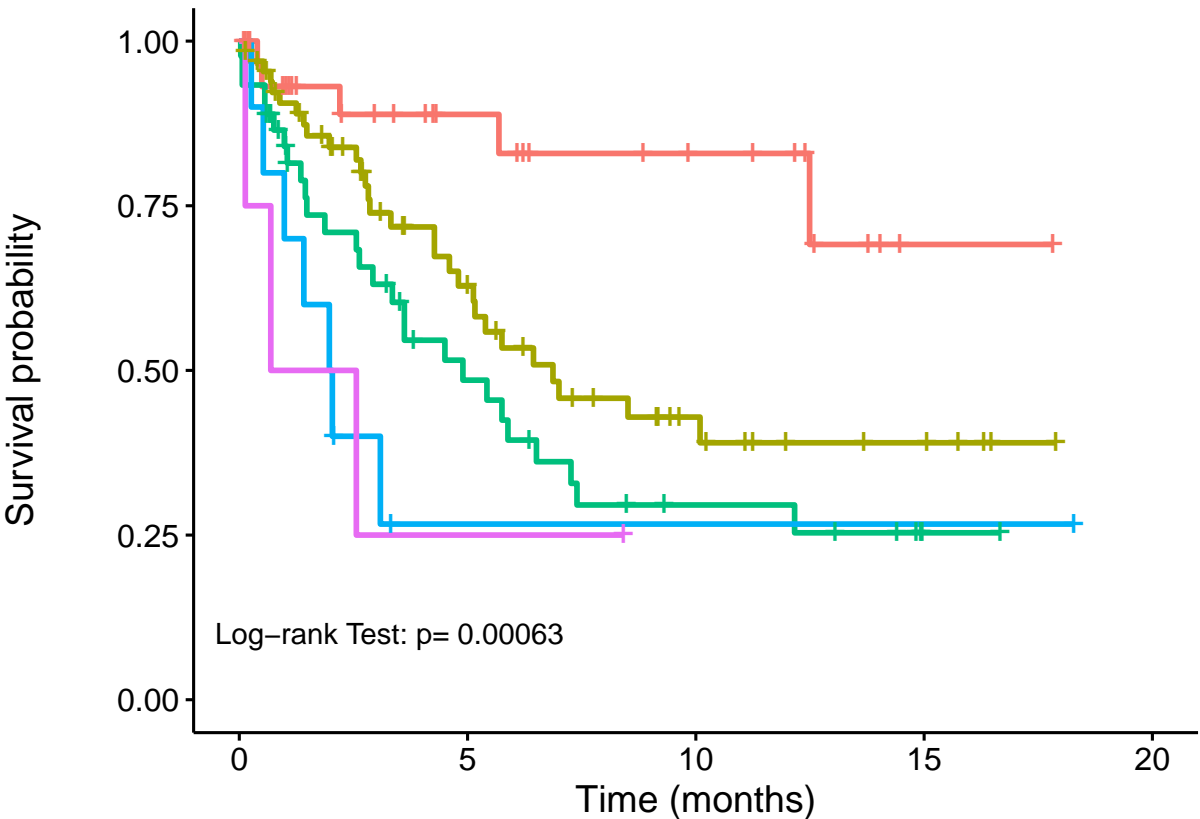

Number at risk (number censored)

| Strata | 0      | 5       | 10      | 15     | 20     |
|--------|--------|---------|---------|--------|--------|
| ECOG=0 | 35 (0) | 15 (17) | 9 (22)  | 1 (29) | 0 (30) |
| ECOG=1 | 66 (0) | 27 (19) | 11 (27) | 5 (32) | 0 (37) |
| ECOG=2 | 45 (0) | 16 (9)  | 7 (12)  | 1 (17) | 0 (18) |
| ECOG=3 | 10 (0) | 1 (2)   | 1 (2)   | 1 (2)  | 0 (3)  |
| ECOG=4 | 4 (0)  | 1 (0)   | 0 (1)   | 0 (1)  | 0 (1)  |

Time (months)
