# Supplementary figures and images for: Introducing Computed Tomography Simulation–Free and Electronic Patient-Reported Outcomes–Monitored Palliative Radiation Therapy into Routine Care: Clinical Outcomes and Implementation Experience
Source: PubMed Central journal article supplement — Adv Radiat Oncol. 2020 Dec 3;6(2):100632. doi: 10.1016/j.adro.2020.100632 (PMC8039552; doi:10.1016/j.adro.2020.100632), 2020-12-03

Strata All

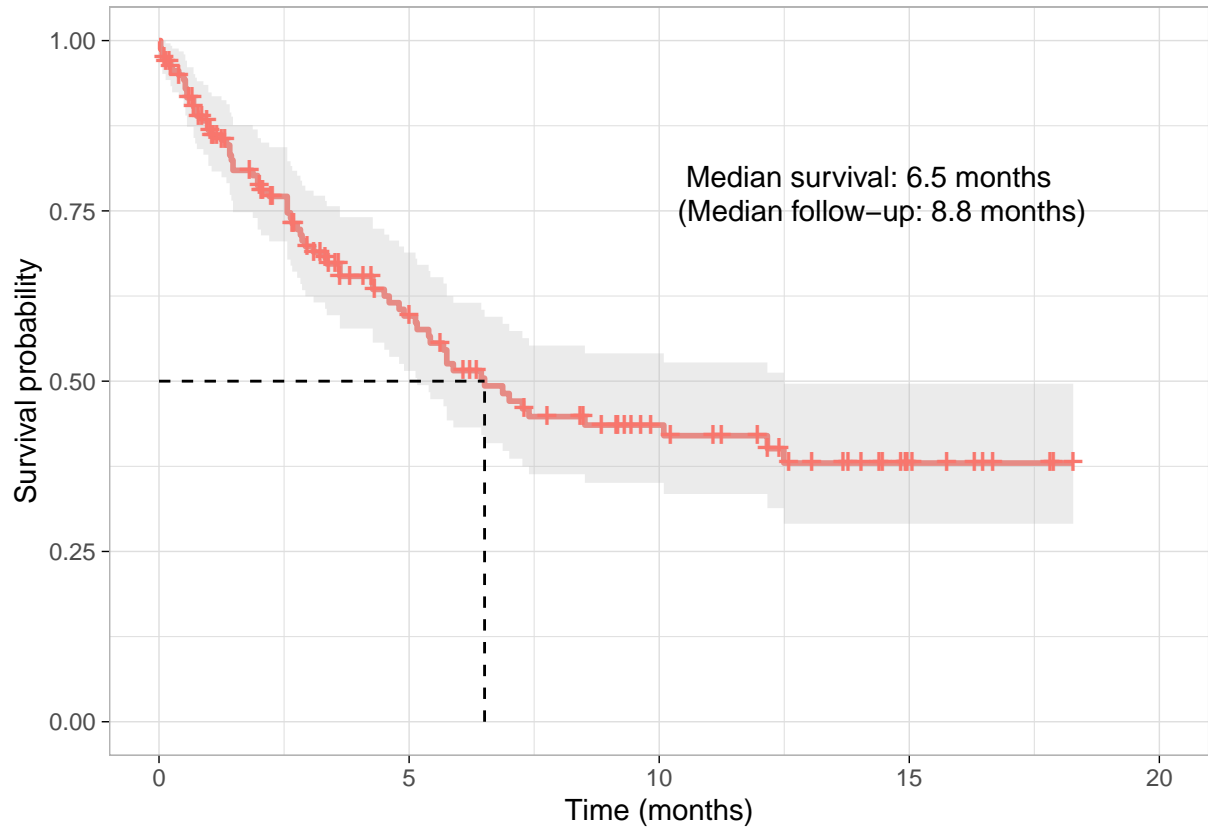

Number at risk (number censored)

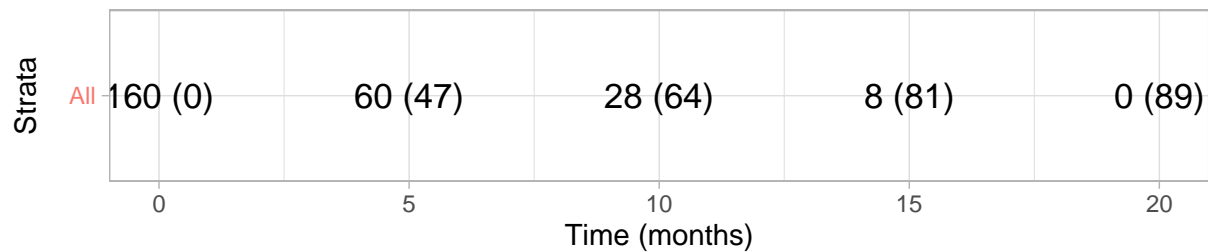

Supplement: mmc3.pdf [file mmc3.pdf]
